# Supplementary material for: Temporal Uncoupling between Energy Acquisition and Allocation to Reproduction in a Herbivorous-Detritivorous Fish
Source: PLoS One. 2016 Mar 3;11(3):e0150082. doi: 10.1371/journal.pone.0150082 (PMC4777362; doi:10.1371/journal.pone.0150082)
Supplement: S2 Table — Raw data of the primary sources (biofilm, detritus and filamentous algae) from which we draw the conclusions presented in the manuscript. Abreviations of attributes are as follows: d13c = δ13C, d15n = δ15N, %c = percentage of carbon, %n = percentage of nitrogen. (XLS) [file pone.0150082.s005.xls]

## Sheet: Sheet1
season	group	d13c	d15n	%c	%n
Dry	biofilm	-27.51	3.37	3.34	0.4
Dry	biofilm	-22.85	4.67	17.68	1.95
Dry	biofilm	-23.09	3.42	15.14	1.71
Dry	biofilm	-27.03	1.55	2.61	0.14
Dry	biofilm	-24.43	5.2	23.06	2.02
Dry	biofilm	-25.87	6.68	16.92	1.9
Dry	biofilm	-26.09	2.95	4.39	0.29
Dry	biofilm	-25.09	2.97	15.42	1.73
Dry	biofilm	-28.99	3.88	21.64	1.57
Dry	biofilm	-29.34	1.21	2.39	0.2
Dry	biofilm	-29.5	4.42	20.92	1.5
Dry	biofilm	-32.26	10.64	2.9	0.2
Dry	biofilm	-31.39	4.69	33.47	2.25
Dry	biofilm	-31.29	11.58	3.6	0.3
Dry	biofilm	-31.07	3.1	4.39	0.25
Dry	biofilm	-30.27	3.8	23.92	1.36
Dry	biofilm	-37.11	27.55	9.6	1.2
Dry	biofilm	-29.85	8.26	17.31	1.71
Dry	biofilm	-27.83	6.42	24.75	1.54
Dry	biofilm	-25.27	3.79	2.2	0.2
Dry	biofilm	-27.15	5.25	13.3	0.82
Dry	biofilm	-25.93	11.52	2.5	0.2
Dry	biofilm	-18.15	4.37	17	1.57
Dry	biofilm	-25.64	6.04	7.53	1.04
Dry	biofilm	-29.76	8.13	22.69	2.82
Dry	biofilm	-23.29	2.57	2.29	0.26
Dry	biofilm	-28.17	3.55	3.19	0.53
Dry	biofilm	-28.61	6.45	2.58	0.44
Dry	biofilm	-29.23	4.15	1.12	0.18
Dry	biofilm	-28.73	4.13	1.57	0.26
Dry	biofilm	-24.38	3.15	2.74	0.26
Dry	biofilm	-26.81	4.35	1.52	0.24
Dry	biofilm	-22.21	-0.19	33.37	3.51
Dry	biofilm	-25.31	1.88	2.5	0.34
Dry	biofilm	-26.14	9.06	0.61	0.07
Dry	biofilm	-28.89	3.36	4.72	0.88
Dry	biofilm	-28.97	2.26	7.42	1.46
Dry	biofilm	-24.64	5.54	4.44	0.46
Dry	biofilm	-25.91	3.54	1.38	0.2
Dry	biofilm	-28.35	3.99	38.91	5.36
Dry	biofilm	-25.59	11.48	0.44	0.05
Dry	biofilm	-29.04	3.03	6.21	1.2
Dry	biofilm	-26.9	0.3	2.78	0.35
Dry	biofilm	-26.12	3.04	4.57	0.62
Dry	biofilm	-18.33	0.56	36.3	3.11
Dry	biofilm	-27.46	4.85	17.07	0.79
Dry	biofilm	-27.08	4.76	1.7	0.15
Dry	biofilm	-29.03	5.62	7.5	0.42
Dry	biofilm	-24.78	3.87	7.41	0.56
Dry	biofilm	-27.87	-0.71	1.95	0.12
Dry	biofilm	-28.59	4.32	4.27	0.24
Dry	biofilm	-24.56	4.95	1.02	0.1
Dry	biofilm	-27.65	4.18	15.75	0.79
Dry	biofilm	-26.27	4.35	7.69	0.56
Dry	biofilm	-26.92	11.04	1.09	0.08
Dry	biofilm	-29.02	2.47	1.57	0.09
Dry	biofilm	-28.58	-5.82	0.47	0.03
Dry	biofilm	-28.36	3.01	9.52	0.76
Dry	biofilm	-28.28	3.57	18.47	1.55
Dry	biofilm	-27.39	4.15	2.65	0.27
Dry	biofilm	-26.48	5.2	2.04	0.22
Dry	biofilm	-26.73	3.24	33.08	2.8
Dry	biofilm	-27.07	3.38	31.06	2.17
Dry	biofilm	-25.63	7.9	0.48	0.05
Dry	biofilm	-29.56	4.68	11.23	1.38
Dry	biofilm	-28.29	4.77	23.73	2.38
Dry	biofilm	-25.48	3.05	34.51	3.23
Dry	biofilm	-20.12	-0.73	11.41	1.38
Dry	biofilm	-25.21	0.38	12.05	1.23
Dry	biofilm	-29.61	3.06	19.74	2.4
Dry	biofilm	-26.34	1.81	3.1	0.2
Dry	biofilm	-27.05	2.51	25.76	2.22
Dry	biofilm	-28.43	3.6	10.75	0.99
Dry	biofilm	-28.29	4.87	12.17	1.48
Dry	biofilm	-28.21	0.68	6.3	1.04
Dry	biofilm	-26.96	3.03	3.5	0.38
Dry	biofilm	-28.41	3.25	17.27	1.37
Dry	biofilm	-27.28	3.03	3.39	0.38
Dry	biofilm	-28.33	3.28	2.25	0.24
Dry	biofilm	-28.66	3.67	2.63	0.3
Dry	biofilm	-27.97	3.56	17.43	1.55
Dry	biofilm	-27.6	1.64	6.49	0.61
Dry	biofilm	-29.01	4.13	20.06	1.87
Dry	biofilm	-29.41	4.54	19.54	1.72
Dry	biofilm	-28.83	4.6	17.96	1.44
Dry	biofilm	-28.48	4.7	20.7	1.9
Dry	biofilm	-23.54	3.03	2.2	0.2
Dry	biofilm	-18.82	5.93	1.6	0.2
Dry	biofilm	-19.72	2.76	2.5	0.4
Dry	detritus	-31.56	1.84	51.41	1.02
Dry	detritus	-30.04	2.69	52.22	0.28
Dry	detritus	-30.97	1.97	57.19	0.97
Dry	detritus	-31.69	-2.07	52.06	0.42
Dry	detritus	-30.42	1.43	50.36	0.69
Dry	detritus	-30.55	1.9	54.57	0.97
Dry	detritus	-31.58	2.32	49.78	0.48
Dry	detritus	-30.88	0.45	49.54	0.4
Dry	detritus	-32.22	1.09	51.42	0.4
Dry	detritus	-31.8	1.85	50.31	0.57
Dry	detritus	-30.79	2.66	51.46	0.46
Dry	detritus	-31.97	0.55	51.09	0.66
Dry	filamentous	-19.22	-0.12	22.9	3.35
Dry	filamentous	-36.71	6.16	13.7	0.65
Dry	filamentous	-17.08	0.51	42.87	2.67
Dry	filamentous	-29.43	4.91	29.58	1.84
Dry	filamentous	-29.94	5.24	28.14	1.85
Dry	filamentous	-28.33	2.36	13.88	0.45
Dry	filamentous	-28.26	2.04	33.58	0.58
Dry	filamentous	-30.43	1.86	30.87	2.04
Dry	filamentous	-30.76	2.02	36.35	1.5
Dry	filamentous	-30.06	1.83	32.44	2.05
Dry	filamentous	-30.32	5.76	30.61	1.51
Dry	filamentous	-30.4	5.26	18.27	0.81
Dry	filamentous	-30.48	6.1	32.86	1.75
Dry	filamentous	-20.41	0.84	34.85	2.25
Dry	filamentous	-31.81	1.12	35.71	1.75
Dry	filamentous	-31.92	1.38	30.03	1.4
Wet	biofilm	-30.73	2.01	22.75	1.51
Wet	biofilm	-24	6.7	28.35	2.95
Wet	biofilm	-27.7	2.64	31.36	3.01
Wet	biofilm	-30.81	0.63	43.11	2.1
Wet	biofilm	-21.18	3.67	28.13	2.65
Wet	biofilm	-30.2	4.94	26.78	2.45
Wet	biofilm	-28.01	3.86	22.57	1.96
Wet	biofilm	-24.28	6.26	17.85	1.98
Wet	biofilm	-25.41	1.82	20.18	1.92
Wet	biofilm	-21.9	3.47	34.89	2.75
Wet	biofilm	-26.23	3.04	25.47	2.32
Wet	biofilm	-27.78	3.84	29.64	2.09
Wet	biofilm	-17.68	0.62	37.86	2.25
Wet	biofilm	-20.96	-0.16	39.93	2.13
Wet	biofilm	-24.38	6.57	36.4	5.04
Wet	biofilm	-28.5	1.88	19.28	1.61
Wet	biofilm	-26.57	2.9	26.94	2.73
Wet	biofilm	-25.41	4.15	23.71	1.63
Wet	biofilm	-28.99	4.85	27.39	2.92
Wet	biofilm	-30.67	5.66	17.86	1.79
Wet	biofilm	-25.38	6.82	12.82	1.52
Wet	biofilm	-26.7	4.36	23	2.94
Wet	biofilm	-28.87	4.84	26.72	2.45
Wet	detritus	-27.9	5.5	43.61	1.83
Wet	detritus	-32.66	1.92	48.02	0.39
Wet	filamentous	-34.75	0.46	34.8	1.36
Wet	filamentous	-36.63	4.34	35.2	1.8
